# Supplementary material for: How did the domestication of Fertile Crescent grain crops increase their yields?
Source: PubMed Central journal article supplement (PMC5324541; doi:10.1111/1365-2435.12760), 2016-10-03
Supplement: FEC-31-387-s004.pdf [file FEC-31-387-s004.pdf]

**Fig. S4** Correlation between  $\ln(\text{total seed yield})$  and  $\ln(\text{total aboveground biomass})$  for the cereal and pulse species. The mean values of the raw data are plotted.  $R^2 = 0.86$ ,  $P < 0.0001$ .

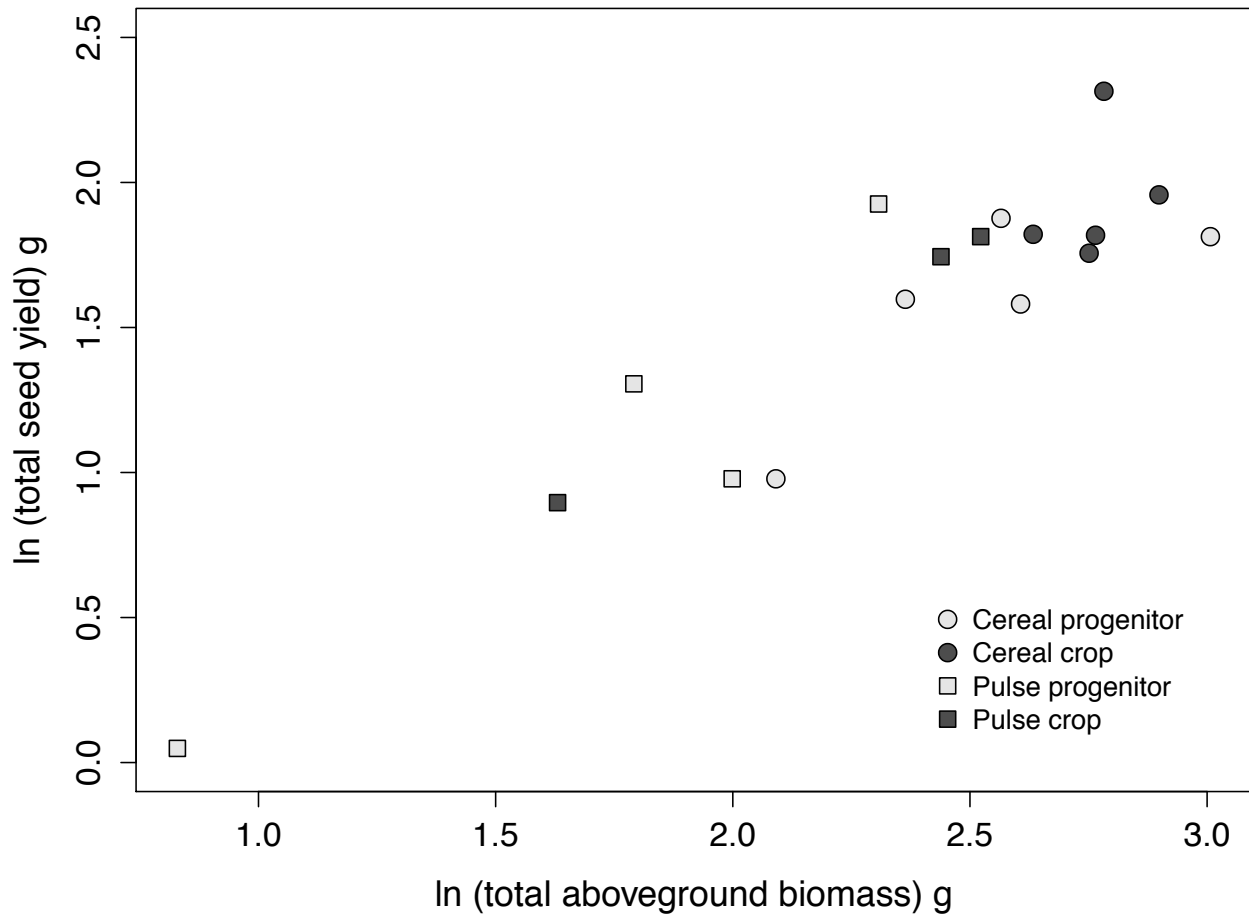

**Fig. S5** Correlation between  $\ln(\text{total seed yield})$  and  $\ln(\text{individual seed mass})$  for the cereal and pulse species. The mean values of the raw data are plotted.  $R^2 = 0.54$ ,  $P < 0.001$ .

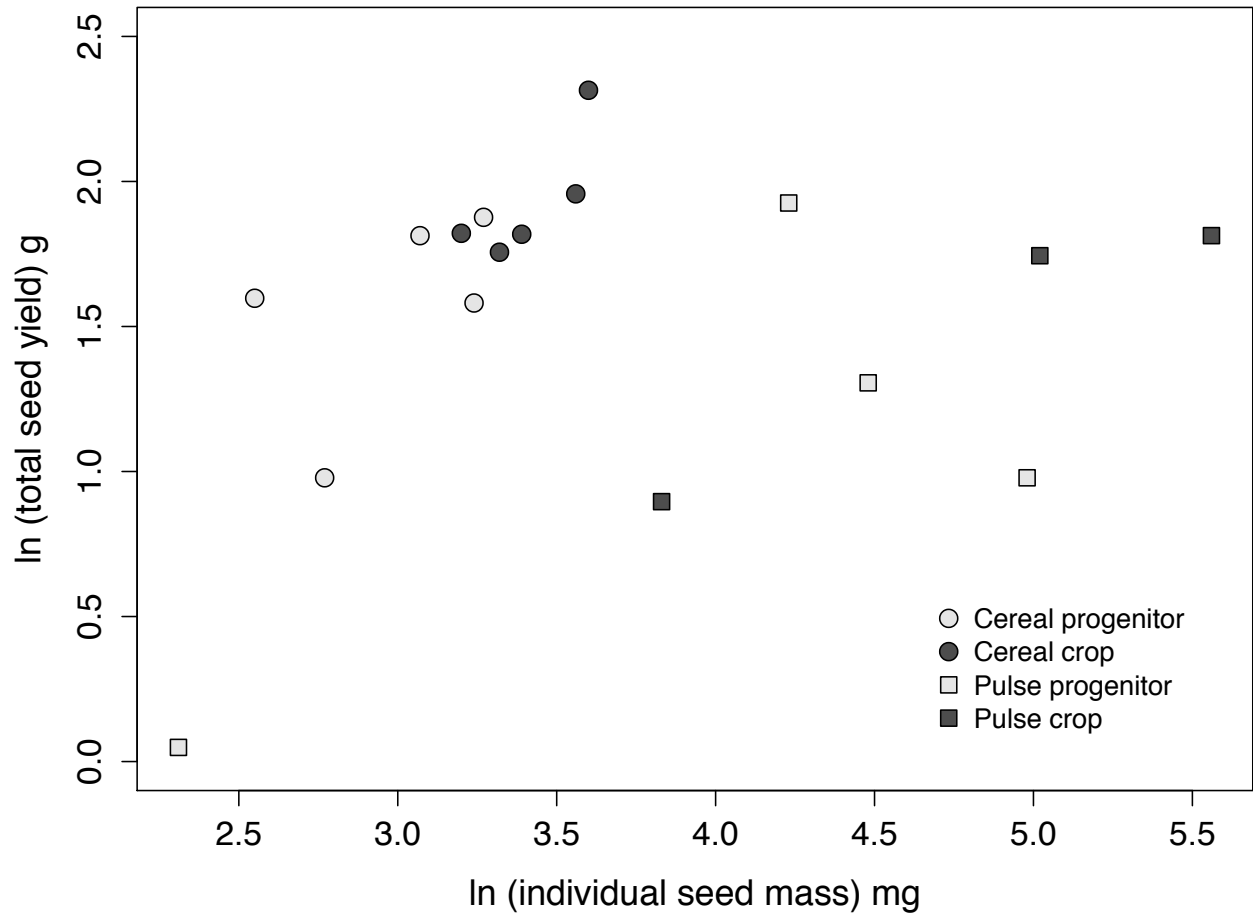

**Fig. S6** Correlation between  $\ln(\text{total aboveground biomass})$  and  $\ln(\text{individual seed mass})$  for the cereal and pulse species. The mean values of the raw data are plotted.  $R^2 = 0.60$ ,  $P < 0.001$ .

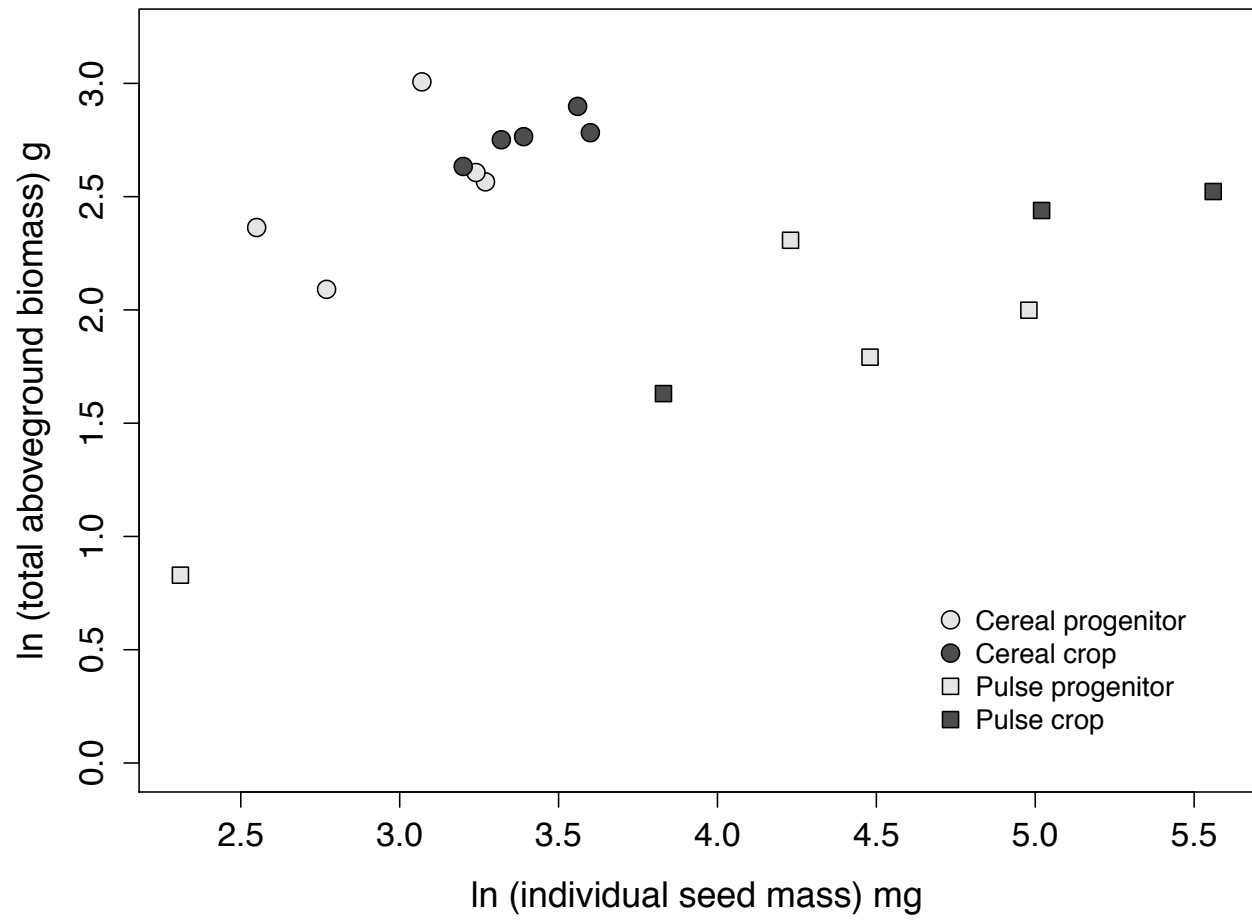

**Appendix S1** A brief description of the variance approximation used for the variance decomposition analysis.

Assume we want to approximate the variance of some function  $f(x, y)$  where  $x$  and  $y$  are random variables with means  $\mu_x, \mu_y$  and the variances and covariance given by  $V(x), V(y)$  and  $C(x, y)$  respectively.

The standard first order Taylor approximation of  $f(x, y)$  evaluated at the means is

$$f(x, y) \approx f(\mu_x, \mu_y) + \frac{\partial f(x, y)}{\partial x} (x - \mu_x) + \frac{\partial f(x, y)}{\partial y} (y - \mu_y)$$

Taking variances of this expression we get

$$V(f(x, y)) \approx \left( \frac{\partial f(x, y)}{\partial x} \right)^2 V(x) + \left( \frac{\partial f(x, y)}{\partial y} \right)^2 V(y) + 2 \frac{\partial f(x, y)}{\partial x} \frac{\partial f(x, y)}{\partial y} C(x, y)$$

where all the partial derivatives are evaluated at  $\mu_x, \mu_y$ . This is the standard delta method approximation to the variance of a function.
