# Supplementary material for: How did the domestication of Fertile Crescent grain crops increase their yields?
Source: PubMed Central journal article supplement (PMC5324541; doi:10.1111/1365-2435.12760), 2016-10-03
Supplement: FEC-31-387-s005.pdf [file FEC-31-387-s005.pdf]

**Supporting Information for C. Preece *et al.*, 2016, “How did the domestication of Fertile Crescent grain crops increase their yields?”**

**Table S1** List of grass accessions used, including the seed bank they were obtained from, country of origin and mean individual seed mass in mg ( $\pm$  1SE). Seed banks used were the USDA Germplasm Resources Information System (GRIN), IPK Gatersleben Genebank (IPK) and John Innes Centre Germplasm Resources Unit (JIC).

| Species                                                                   | Group      | Seed bank | Accession numbers | Country of origin | Individual seed mass mg ( $\pm$ 1SE) | Experiment         |
|---------------------------------------------------------------------------|------------|-----------|-------------------|-------------------|--------------------------------------|--------------------|
| <i>Avena sativa</i> L.                                                    | Landrace   | GRIN      | PI 168072         | Turkey            | 30.21 $\pm$ 0.95                     | 2011 yield and RGR |
|                                                                           |            | GRIN      | PI 173583         | Turkey            | 22.08 $\pm$ 0.59                     | 2011 yield and RGR |
| <i>Avena sterilis</i> L.                                                  | Progenitor | GRIN      | PI 326955         | Israel            | 11.18 $\pm$ 0.59                     | 2011 yield         |
|                                                                           |            | GRIN      | PI 134251         | Afghanistan       | 22.32 $\pm$ 0.19                     | 2011 yield         |
|                                                                           |            | GRIN      | PI 309424         | Israel            | 13.64 $\pm$ 1.31                     | 2011 yield         |
|                                                                           |            | GRIN      | PI 309527         | Israel            | 11.52 $\pm$ 0.72                     | RGR                |
|                                                                           |            | GRIN      | PI 220372         | Afghanistan       | 16.05 $\pm$ 0.72                     | RGR                |
|                                                                           |            | GRIN      | PI 282628         | Israel            | 19.37 $\pm$ 1.34                     | 2011 yield         |
| <i>Hordeum vulgare</i> L.<br>subsp. <i>spontaneum</i> (K.<br>Koch) Thell. | Progenitor | GRIN      | PI 466114         | Syria             | 26.76 $\pm$ 1.08                     | 2011 yield         |
|                                                                           |            | GRIN      | PI 236387         | Syria             | 28.67 $\pm$ 0.74                     | 2013 yield         |
|                                                                           |            | GRIN      | PI 354944         | Israel            | 33.27 $\pm$ 2.30                     | 2013 yield         |
|                                                                           |            | GRIN      | HOR2688           | Iran              | 25.45 $\pm$ 2.18                     | 2013 yield         |
|                                                                           |            | GRIN      | PI 282656         | Israel            | 12.86 $\pm$ 0.79                     | RGR                |
|                                                                           |            | GRIN      | PI 466126         | Syria             | 28.75 $\pm$ 0.88                     | RGR                |

|                                                                              |            |      |           |             |              |                    |
|------------------------------------------------------------------------------|------------|------|-----------|-------------|--------------|--------------------|
| <i>Hordeum vulgare</i> L.<br>subsp. <i>vulgare</i>                           | Landrace   | GRIN | Ciho 1464 | Iraq        | 44.99 ± 0.95 | 2011 yield and RGR |
|                                                                              |            | GRIN | Ciho 1465 | Iraq        | 26.43 ± 1.06 | 2011 yield         |
|                                                                              |            | JIC  | 18208     | Iran        | 28.39 ± 3.28 | 2013 yield         |
|                                                                              |            | JIC  | 3604      | Israel      | 49.29 ± 3.79 | 2013 yield         |
|                                                                              |            | JIC  | 20153     | Syria       | 42.97 ± 5.80 | 2013 yield         |
| <i>Secale cereale</i> L. subsp.<br><i>cereale</i>                            | Landrace   | GRIN | PI 168130 | Turkey      | 25.71 ± 0.60 | 2011 yield         |
|                                                                              |            | GRIN | PI 357058 | Turkey      | 29.27 ± 0.24 | 2011 yield and RGR |
| <i>Secale vavilovii</i> Grossh.                                              | Progenitor | GRIN | PI 284842 | Hungary     | 28.81 ± 0.72 | 2011 yield and RGR |
|                                                                              |            | GRIN | PI 573649 | Afghanistan | 21.74 ± 0.63 | 2011 yield and RGR |
| <i>Triticum monococcum</i> L.<br>subsp. <i>aegilopoides</i><br>(Link) Thell. | Progenitor | GRIN | PI 427452 | Turkey      | 14.51 ± 1.39 | 2011 yield         |
|                                                                              |            | GRIN | PI 245726 | Turkey      | 16.13 ± 2.25 | 2011 yield         |
|                                                                              |            | GRIN | PI 554577 | Turkey      | 13.41 ± 2.43 | 2013 yield         |
|                                                                              |            | GRIN | PI 427997 | Lebanon     | 14.97 ± 1.25 | 2013 yield         |
|                                                                              |            | IPK  | TRI17105  | Iran        | 20.26 ± 0.61 | 2013 yield         |
|                                                                              |            | GRIN | PI 352503 | Iran        | 14.18 ± 0.66 | RGR                |
|                                                                              |            | GRIN | PI 427697 | Iraq        | 12.37 ± 0.99 | RGR                |

|                                                                                                 |            |      |           |         |              |                    |
|-------------------------------------------------------------------------------------------------|------------|------|-----------|---------|--------------|--------------------|
| <i>Triticum monococcum</i> L.<br>subsp. <i>monococcum</i>                                       | Landrace   | GRIN | PI 428161 | Turkey  | 25.71 ± 0.67 | 2011 yield and RGR |
|                                                                                                 |            | GRIN | PI 167615 | Turkey  | 31.16 ± 0.84 | 2011 yield         |
|                                                                                                 |            | GRIN | PI 427927 | Iraq    | 27.51 ± 1.81 | 2013 yield         |
|                                                                                                 |            | JIC  | 1040052   | Syria   | 33.46 ± 2.58 | 2013 yield         |
|                                                                                                 |            | JIC  | 1040041   | Turkey  | 26.98 ± 1.78 | 2013 yield         |
|                                                                                                 |            | GRIN | PI 167526 | Turkey  | 30.26 ± 1.21 | RGR                |
| <i>Triticum turgidum</i> L.<br>subsp. <i>dicoccoides</i> (Körn.<br>ex Asch. &<br>Graebn.)Thell. | Progenitor | GRIN | PI 300989 | Israel  | 27.28 ± 1.04 | 2011 yield         |
|                                                                                                 |            | GRIN | PI 428022 | Turkey  | 23.23 ± 0.98 | 2011 yield         |
|                                                                                                 |            | GRIN | PI 352324 | Lebanon | 26.71 ± 1.09 | 2013 yield and RGR |
|                                                                                                 |            | GRIN | PI 428017 | Turkey  | 43.11 ± 4.33 | 2013 yield         |
|                                                                                                 |            | GRIN | PI 487242 | Syria   | 27.55 ± 2.50 | 2013 yield         |
| <i>Triticum turgidum</i> L.<br>subsp. <i>dicoccon</i><br>(Schrank) Thell.                       | Landrace   | GRIN | PI 470737 | Turkey  | 35.31 ± 1.30 | 2011 yield         |
|                                                                                                 |            | GRIN | PI 470739 | Turkey  | 32.51 ± 1.05 | 2011 yield and RGR |
|                                                                                                 |            | GRIN | PI 182743 | Turkey  | 50.24 ± 1.58 | 2013 yield         |
|                                                                                                 |            | GRIN | PI 624903 | Iran    | 43.65 ± 1.65 | 2013 yield         |
|                                                                                                 |            | JIC  | 1070009   | Iran    | 36.04 ± 0.64 | 2013 yield         |
|                                                                                                 |            | GRIN | PI 94626  | Turkey  | 45.23 ± 1.74 | RGR                |

**Table S2** List of legume accessions used, including the seed bank they were obtained from, country of origin and mean individual seed mass in mg ( $\pm$  1SE). Seed banks used were the USDA Germplasm Resources Information System (GRIN), and John Innes Centre Germplasm Resources Unit (JIC).

| Species                                                    | Group      | Seed bank | Accession | Country of origin | Mean seed mass<br>mg ( $\pm$ 1SE) | Experiment                |
|------------------------------------------------------------|------------|-----------|-----------|-------------------|-----------------------------------|---------------------------|
| <i>Cicer arietinum</i> L.                                  | Landrace   | GRIN      | PI 543059 | Pakistan          | 153.9 $\pm$ 4.50                  | 2011 yield and RGR        |
|                                                            |            | GRIN      | PI 339154 | Turkey            | 320.0 $\pm$ 13.07                 | 2011 & 2013 yield and RGR |
|                                                            |            | GRIN      | PI 339186 | Turkey            | 327.0 $\pm$ 23.29                 | 2013 yield                |
| <i>Cicer reticulatum</i> Ladiz.                            | Progenitor | GRIN      | PI 489777 | Turkey            | 127.2 $\pm$ 5.41                  | 2011 & 2013 yield and RGR |
|                                                            |            | GRIN      | PI 510656 | Turkey            | 141.0 $\pm$ 4.51                  | 2011 yield                |
|                                                            |            | GRIN      | PI 599092 | Turkey            | 156.7 $\pm$ 15.32                 | 2013 yield                |
| <i>Lens culinaris</i> subsp.<br><i>culinaris</i>           | Landrace   | GRIN      | PI 339294 | Turkey            | 34.8 $\pm$ 0.58                   | 2011 yield and RGR        |
|                                                            |            | GRIN      | PI 339263 | Turkey            | 64.4 $\pm$ 1.00                   | 2011 yield and RGR        |
|                                                            |            | GRIN      | PI 298026 | Turkey            | 22.8 $\pm$ 2.27                   | 2013 yield                |
|                                                            |            | GRIN      | PI 308609 | Syria             | 61.9 $\pm$ 4.85                   | 2013 yield                |
|                                                            |            | GRIN      | PI 308610 | Syria             | 43.9 $\pm$ 7.53                   | 2013 yield                |
| <i>Lens culinaris</i> subsp.<br><i>orientalis</i> (Boiss.) | Progenitor | GRIN      | PI 572371 | Israel            | 8.2 $\pm$ 0.25                    | 2011 & 2013 yield and RGR |
|                                                            |            | GRIN      | PI 572379 | Turkey            | 10.6 $\pm$ 0.24                   | 2011 yield and RGR        |
|                                                            |            | GRIN      | PI 572374 | Iran              | 19.0 $\pm$ 1.56                   | 2013 yield                |
|                                                            |            | GRIN      | PI 572366 | Turkey            | 8.7 $\pm$ 0.69                    | 2013 yield                |

|                                                                                                               |            |      |           |        |               |                    |
|---------------------------------------------------------------------------------------------------------------|------------|------|-----------|--------|---------------|--------------------|
| <i>Pisum sativum</i> L. subsp. <i>elatius</i> (Steven ex M. Bieb.) Asch. & Graebn.                            | Progenitor | GRIN | PI 344004 | Turkey | 62.0 ± 1.65   | 2011 yield and RGR |
|                                                                                                               |            | GRIN | PI 343972 | Turkey | 87.7 ± 2.31   | 2011 yield and RGR |
| <i>Pisum sativum</i> L. subsp. <i>elatius</i> (Steven ex M. Bieb.) Asch. & Graebn. var. <i>pumilio</i> Meikle | Progenitor | GRIN | W6 2107   | Turkey | 120.7 ± 5.68  | 2011 yield         |
|                                                                                                               |            | GRIN | W6 12613  | Turkey | 76.4 ± 3.08   | 2011 yield and RGR |
|                                                                                                               |            | GRIN | W6 2101   | Turkey | 70.3 ± 6.14   | 2013 yield         |
|                                                                                                               |            | JIC  | 3273      | Israel | 82.6 ± 4.79   | 2013 yield         |
|                                                                                                               |            | JIC  | 3274      | Israel | 72.9 ± 2.63   | 2013 yield         |
|                                                                                                               |            | GRIN | PI 15013  | Egypt  | 132.5 ± 9.49  | RGR                |
| <i>Pisum sativum</i> L. subsp. <i>sativum</i>                                                                 | Landrace   | GRIN | PI 343986 | Turkey | 188.44 ± 4.90 | 2011 yield         |
|                                                                                                               |            | GRIN | PI 343987 | Turkey | 215.2 ± 6.59  | 2011 yield and RGR |
|                                                                                                               |            | JIC  | 1843      | Israel | 165.1 ± 13.89 | 2013 yield         |
|                                                                                                               |            | JIC  | 3226      | Syria  | 69.8 ± 2.95   | 2013 yield         |
|                                                                                                               |            | JIC  | 1073      | Turkey | 89.6 ± 8.86   | 2013 yield         |
|                                                                                                               |            | GRIN | PI 343985 | Turkey | 201.0 ± 9.47  | RGR                |

---
