# Supplementary material for: How did the domestication of Fertile Crescent grain crops increase their yields?
Source: PubMed Central journal article supplement (PMC5324541; doi:10.1111/1365-2435.12760), 2016-10-03
Supplement: FEC-31-387-s006.pdf [file FEC-31-387-s006.pdf]

**Table S3** Variance-covariance matrices for equation 1 for (a) all species together, (b) cereals only, (c) pulses only and for equation 2 for (d) all species together, (e) cereals only and (f) pulses only.

(a) Equation 1 – all species.

|               | <b>M0</b> | <b>lambda</b> | <b>d</b> | <b>Ar</b> | <b>c</b> |
|---------------|-----------|---------------|----------|-----------|----------|
| <b>M0</b>     | 1.00      |               |          |           |          |
| <b>lambda</b> | -0.76     | 1.00          |          |           |          |
| <b>d</b>      | -0.08     | -0.27         | 1.00     |           |          |
| <b>Ar</b>     | 0.53      | -0.61         | -0.27    | 1.00      |          |
| <b>c</b>      | -0.36     | 0.25          | 0.18     | -0.16     | 1.00     |

(b) Equation 1 – cereals only.

|               | <b>M0</b> | <b>lambda</b> | <b>d</b> | <b>Ar</b> | <b>c</b> |
|---------------|-----------|---------------|----------|-----------|----------|
| <b>M0</b>     | 1.00      |               |          |           |          |
| <b>lambda</b> | -0.34     | 1.00          |          |           |          |
| <b>d</b>      | 0.00      | -0.86         | 1.00     |           |          |
| <b>Ar</b>     | 0.28      | -0.11         | -0.22    | 1.00      |          |
| <b>c</b>      | -0.58     | -0.03         | 0.13     | 0.08      | 1.00     |

(c) Equation 1 – pulses only.

|               | <b>M0</b> | <b>lambda</b> | <b>d</b> | <b>Ar</b> | <b>c</b> |
|---------------|-----------|---------------|----------|-----------|----------|
| <b>M0</b>     | 1.00      |               |          |           |          |
| <b>lambda</b> | -0.89     | 1.00          |          |           |          |
| <b>d</b>      | 0.31      | -0.16         | 1.00     |           |          |
| <b>Ar</b>     | 0.42      | -0.33         | 0.06     | 1.00      |          |
| <b>c</b>      | -0.46     | 0.27          | 0.17     | -0.17     | 1.00     |

(d) Equation 2 – all species.

|                          | <b>New seed mass</b> | <b>Total seed number</b> |
|--------------------------|----------------------|--------------------------|
| <b>New seed mass</b>     | 1.00                 |                          |
| <b>Total seed number</b> | -0.70                | 1.00                     |

(e) Equation 2 – cereals only.

|                                             | <b>Individual seed mass</b> | <b>Seed number per infructescence (Ns)</b> | <b>Infructescence number per plant (Ni)</b> |
|---------------------------------------------|-----------------------------|--------------------------------------------|---------------------------------------------|
| <b>Individual seed mass</b>                 | 1.00                        | -                                          |                                             |
| <b>Seed number per infructescence (Ns)</b>  | -0.17                       | 1.00                                       |                                             |
| <b>Infructescence number per plant (Ni)</b> | 0.01                        | -0.58                                      | 1.00                                        |

(f) Equation 2 – legumes only.

|                          | <b>M0</b> | <b>Total seed number</b> |
|--------------------------|-----------|--------------------------|
| <b>M0</b>                | 1.00      |                          |
| <b>Total seed number</b> | -0.81     | 1.00                     |

**Table S4** Comparison of three statistical methods (pgls, lmekin and lme) used to analyse differences between crops and their progenitors. All traits were natural log transformed except  $d$ ,  $Ar$ ,  $c$  and  $\tilde{\lambda}$ .

| Trait                                    | pgls                 | lmekin                | lme                   |
|------------------------------------------|----------------------|-----------------------|-----------------------|
| $Y$ – total seed yield                   | 1.5 × higher *       | 1.7 × higher **       | 1.8 × higher ***      |
| $M_S$ – individual seed mass             | 1.9 × larger ***     | 1.8 × larger ***      | 1.9 × larger ***      |
| $d$ - duration of growth                 | NS                   | NS                    | NS                    |
| $Ar$ - % reproductive mass               | NS                   | NS                    | NS                    |
| $c$ - proportion of chaff                | 37% less chaff<br>** | 38% less chaff<br>*** | 40% less chaff<br>*** |
| Total aboveground biomass                | 1.4 × larger *       | 1.4 × larger **       | 1.5 × larger ***      |
| $\tilde{\lambda}$ – relative growth rate | NS                   | NS                    | 4% lower **           |
| Total seeds per plant                    | NS                   | NS                    | NS                    |
| Seed number per gram plant biomass       | NS                   | NS                    | 1.4 x higher ***      |
| Height                                   | NS                   | NS                    | 1.1 × taller**        |
| <b>Cereals only</b>                      |                      |                       |                       |
| Infructescence mass                      | 2.1 × larger ***     | 1.8 × larger ***      | 1.8 × larger ***      |
| $N_s$ - number seeds per infructescence  | 1.3 × more **        | 1.3 × more ***        | 1.3 × more ***        |
| $N_i$ - number of infructescences        | NS                   | NS                    | NS                    |

**Table S5** Comparison of three statistical methods (pgls, lmekin and lme) used to analyse between-species correlations.

| Correlation                                          | pgls                                                             | lmekin                                           | lme                                              |
|------------------------------------------------------|------------------------------------------------------------------|--------------------------------------------------|--------------------------------------------------|
| ln (total seed yield) ~ ln (aboveground biomass)     | $P < 0.0001$<br>Intercept = -1.1<br>Slope = 1.11<br>$R^2 = 0.86$ | $P < 0.0001$<br>Intercept = -0.6<br>Slope = 0.85 | $P < 0.0001$<br>Intercept = -1.1<br>Slope = 1.06 |
| ln (total seed yield) ~ ln (individual seed mass)    | $P < 0.001$<br>Intercept = -0.8<br>Slope = 0.58<br>$R^2 = 0.54$  | $P < 0.0001$<br>Intercept = -0.1<br>Slope = 0.33 | $P < 0.0001$<br>Intercept = -0.4<br>Slope = 0.59 |
| ln (aboveground biomass) ~ ln (individual seed mass) | $P < 0.001$<br>Intercept = 0.3<br>Slope = 0.52<br>$R^2 = 0.60$   | $P < 0.0001$<br>Intercept = 1.3<br>Slope = 0.21  | $P < 0.0001$<br>Intercept = 1.4<br>Slope = 0.34  |
